# Supplementary material for: Large scale production of yolk–shell β-tricalcium phosphate powders, and their bioactivities as novel bone substitutes
Source: Royal Society of Chemistry journal article supplement (doi:10.1039/c4cp01808g), 2014-06-27
Supplement: c4cp01808g1.pdf [file c4cp01808g1.pdf]

## Supporting Information

### Large scale production of yolk-shell $\beta$ -tricalcium phosphate powders, and their bioactivities as novel bone substitutes

Jung Sang Cho,<sup>a</sup> Jong-Heun Lee<sup>b</sup> and Yun Chan Kang<sup>\*a</sup>

<sup>a</sup>Department of Chemical Engineering, Konkuk University, 1 Hwayang-dong, Gwangjin-gu, Seoul 143-701, Korea. E-mail: yckang@konkuk.ac.kr Fax: +82-2-458-3504; Tel: +82-2-2049-6010

<sup>b</sup>Department of Materials Science and Engineering, Korea University, Anam-Dong, Seongbuk-Gu, Seoul 136-713, Korea.

Keywords: yolk-shell structure,  $\beta$ -tri-calcium phosphate, biomaterial, bioactivity, spray drying

#### **This file includes:**

**Figure S1.** Schematic diagram and digital photo of spray dryer applied in the preparation of composite precursor powders of calcium nitrate, diammonium hydrogen phosphate, and carbon source material.

**Figure S2.** SEM images of the combusted  $\beta$ -TCP powders obtained from the spray solutions (a) without carbon source material and with (b) PVP, (c) sucrose, and (d) dextrin.

**Figure S3.** Formation mechanism of the yolk-shell-structured  $\beta$ -TCP powder by spray-drying method using dextrin as carbon source.

**Figure S4.** (a) XRD patterns and (b) FT-IR spectra of the combusted  $\beta$ -TCP powders

obtained from the spray solutions without carbon source material and with PVP and sucrose.

**Figure S5.** N<sub>2</sub> adsorption-desorption isotherms measured at 77 K for the combusted  $\beta$ -TCP powders prepared from the solution without and with various carbon source materials.

**Figure S6.** SEM images of the combusted  $\beta$ -TCP powders from the spray solutions with dextrin at various temperatures: (a) 700 °C, (b) 800 °C, (c) 900 °C, (d) 1000 °C.

**Figure S7.** SEM images of the  $\beta$ -TCP powders prepared from the spray solution with dextrin: a) dextrin concentration- 50 g L<sup>-1</sup>, b) dextrin concentration- 200 g L<sup>-1</sup>

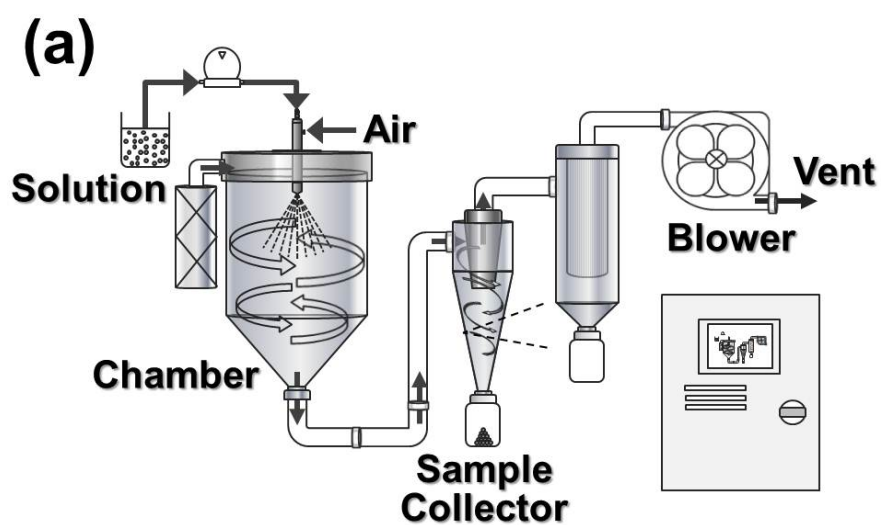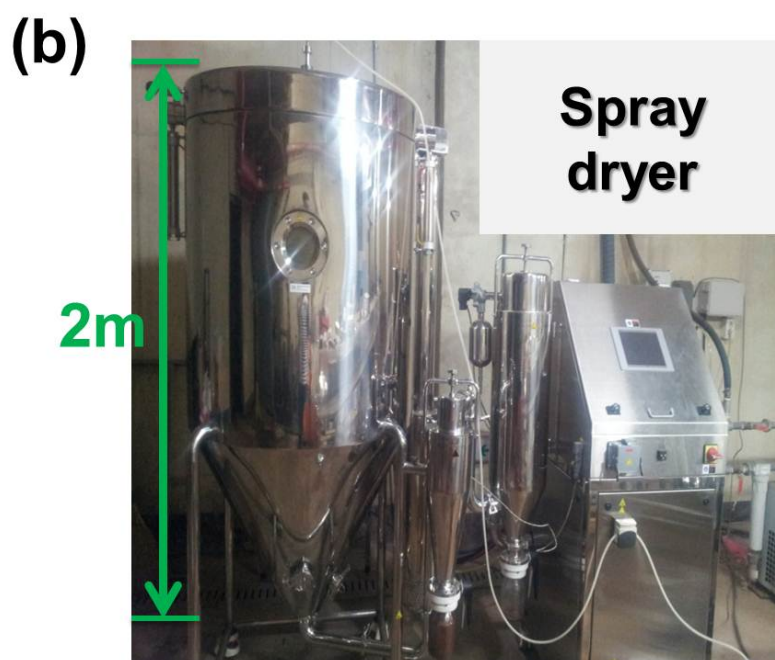

**Figure S1.** Schematic diagram and digital photo of spray dryer applied in the preparation of composite precursor powders of calcium nitrate, diammonium hydrogen phosphate, and carbon source material.

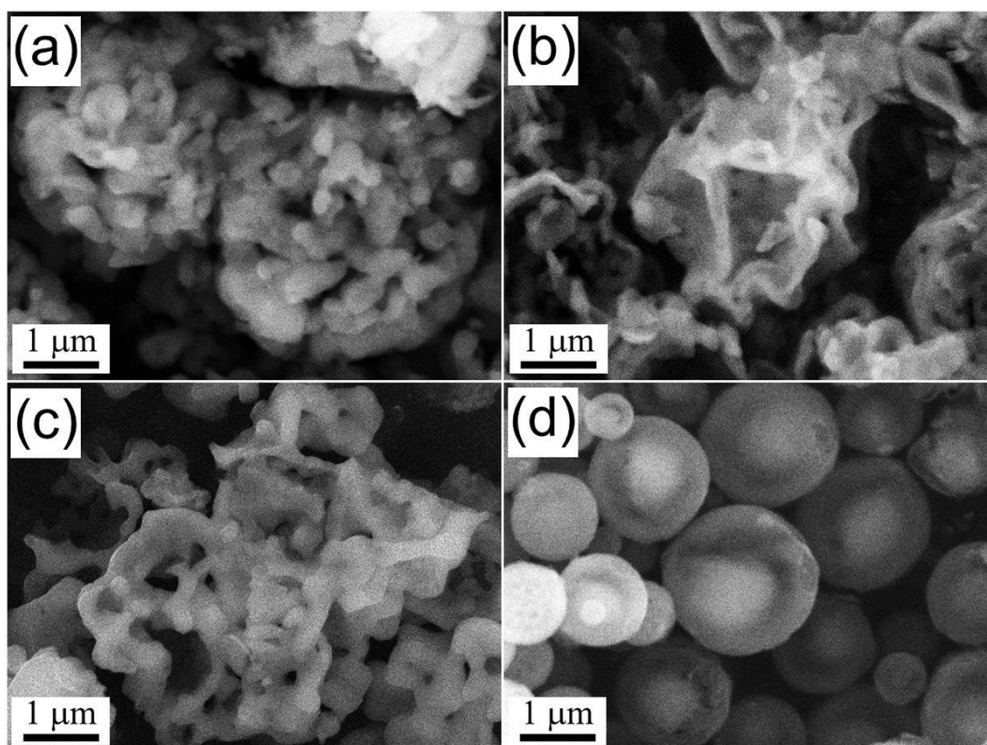

**Figure S2.** SEM images of the combusted  $\beta$ -TCP powders obtained from the spray solutions (a) without carbon source material and with (b) PVP, (c) sucrose, and (d) dextrin.

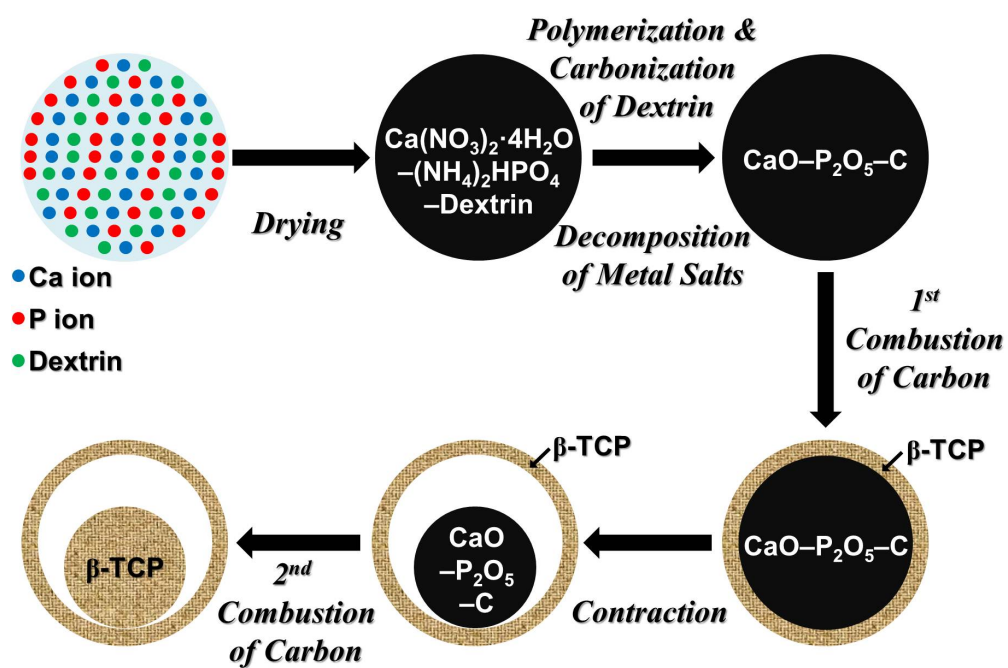

**Figure S3.** Formation mechanism of the yolk-shell-structured  $\beta$ -TCP powder by spray-drying method using dextrin as carbon source.

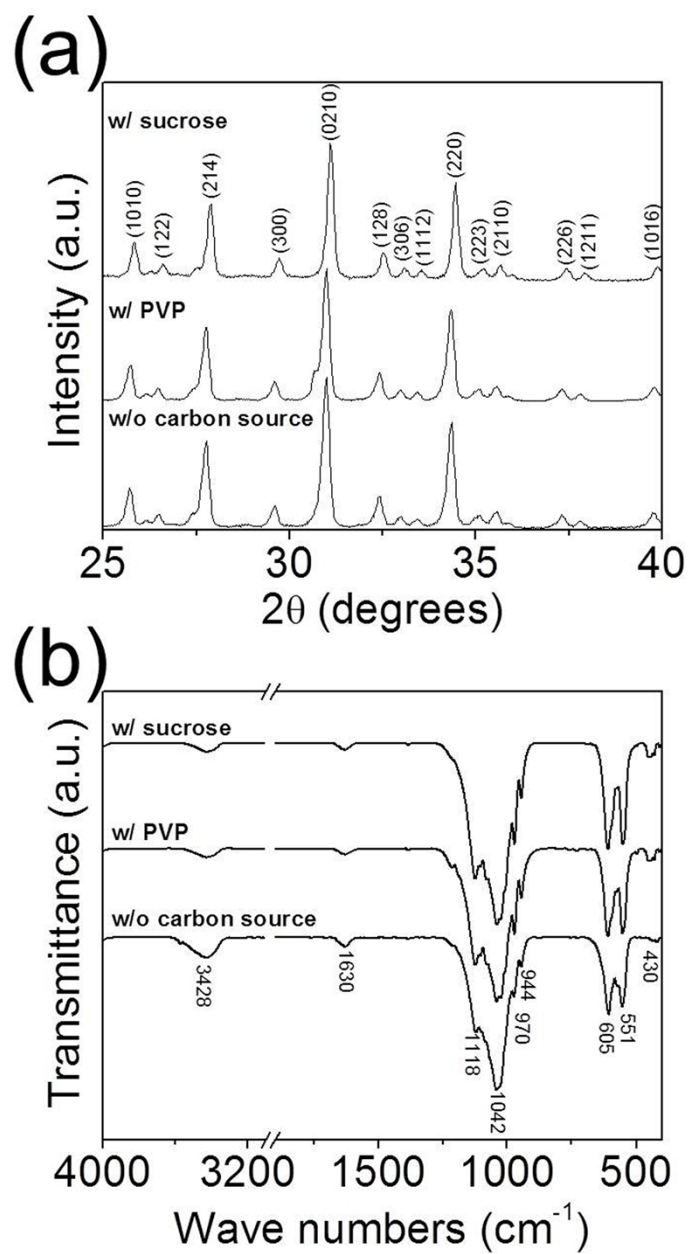

**Figure S4.** (a) XRD patterns and (b) FT-IR spectra of the combusted  $\beta$ -TCP powders obtained from the spray solutions without carbon source material and with PVP and sucrose.

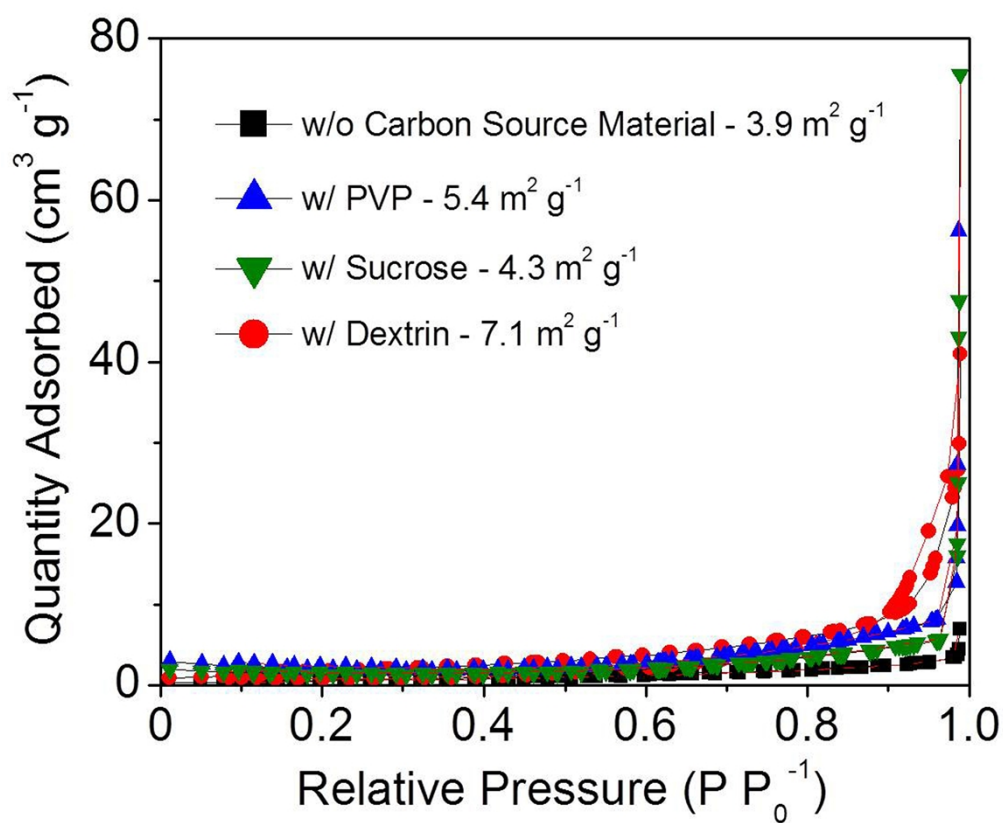

**Figure S5.** N<sub>2</sub> adsorption-desorption isotherms measured at 77 K for the combusted β-TCP powders prepared from the solutions without and with various carbon source materials.

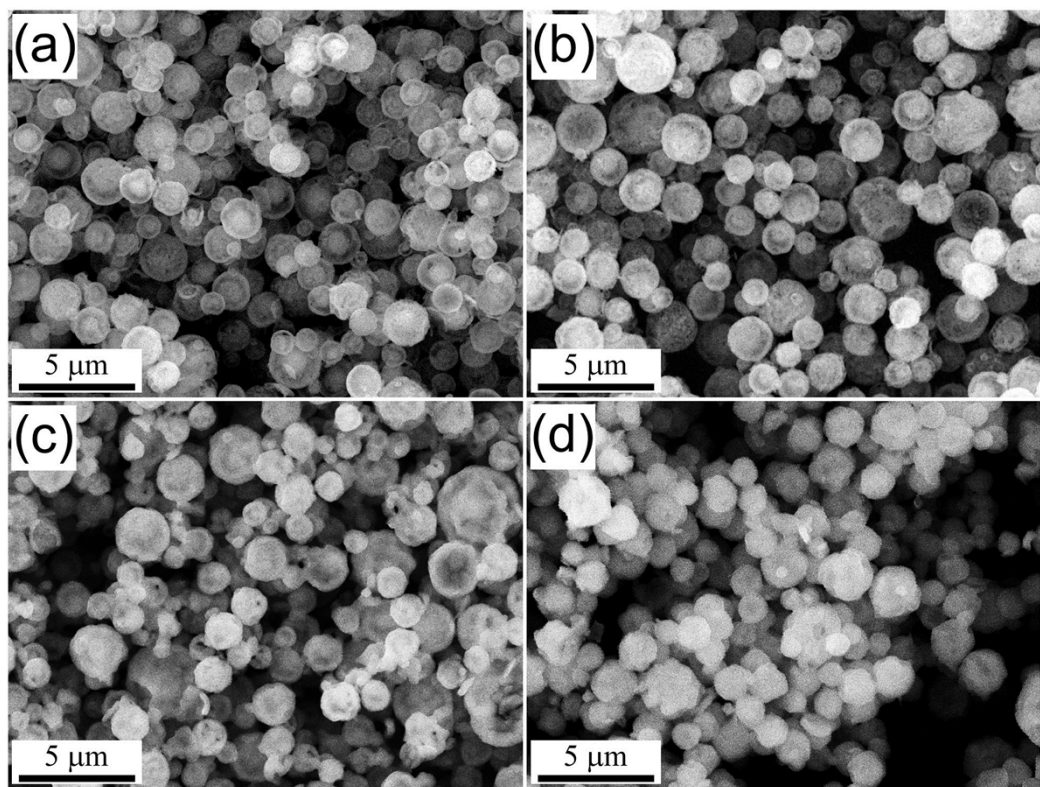

**Figure S6.** SEM images of the combusted  $\beta$ -TCP powders from the calcium phosphate solution with dextrin at various temperatures: (a) 700 °C, (b) 800 °C, (c) 900 °C, and (d) 1000 °C.

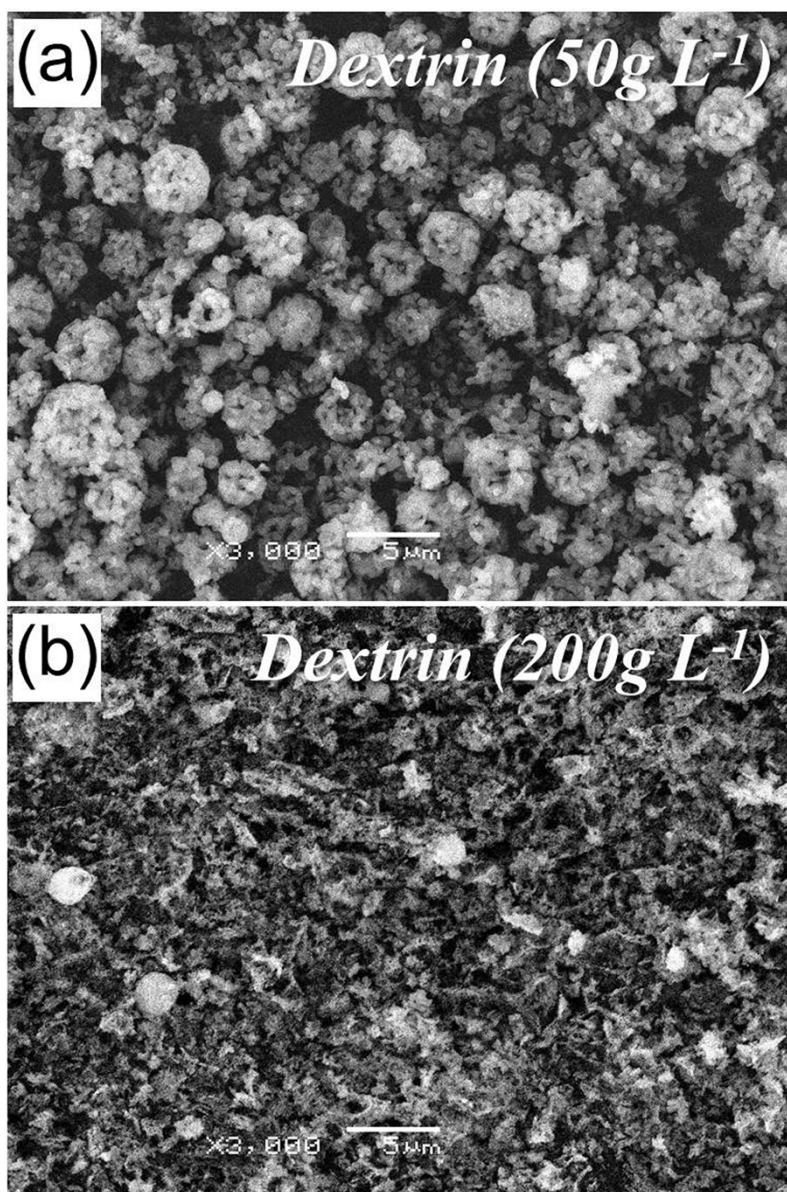

**Figure S7.** SEM images of the  $\beta$ -TCP powders prepared from the spray solution with dextrin: a) dextrin concentration- 50 g L<sup>-1</sup>, b) dextrin concentration- 200 g L<sup>-1</sup>
